# Supplementary material
Source: publisher figshare collection journal article supplement (https://sage.figshare.com/ndownloader/files/17985839)
Supplement: Supplementary file 1 [file 17985839]

# SAGE AUTHORSHIP CHANGE REQUEST

## INSTRUCTIONS:

Please print and complete all sections of this form. We require that all authors (including current co-authors, those to be added and those to be removed) sign the relevant sections below. Once complete, please scan the form and return to [aime@sagepub.co.uk](mailto:aime@sagepub.co.uk)

## SECTION ONE: PAPER INFORMATION

|                                                                                                |                                           |                       |
|------------------------------------------------------------------------------------------------|-------------------------------------------|-----------------------|
| JOURNAL NAME                                                                                   | <i>Advances in Mechanical Engineering</i> |                       |
| PAPER TITLE                                                                                    | MANUSCRIPT ID NUMBER                      |                       |
| <i>Nonlinear vortex-induced vibration dynamics of a flexible pipe conveying two-phase flow</i> |                                           | <i>AME-18-2065-R1</i> |

## SECTION TWO: ESSENTIAL CONDITIONS FOR CHANGE

The new author list should contain only those who can legitimately claim authorship. This is all those who:

- 1) Have made a substantial contribution to the concept and design, acquisition of data or analysis and interpretation of data; AND
- 2) Drafted the article or revised it critically for important intellectual content; AND
- 3) Approved the version to be published.

NB: Registered authors should meet the conditions of all of the points above. All contributors who do not meet the criteria for authorship should instead be listed in an 'Acknowledgements' section.

## SECTION THREE: REASON FOR AUTHORSHIP CHANGE

Please provide a detailed explanation for the change in authors in the box below.

In the revision stage, the change of contribution of the authors made us have to adjust the authorship of the manuscript. Ruyi Cui completed the part of revision work. Yinghui was ~~de~~ removed on the submitted manuscript under his permission because of less contribution in the whole process. We declared that the change of the authorship has been approved by all of us.

#### SECTION FOUR: AUTHOR DECLARATIONS

We agree to the proposed change of authorship to the above paper. NB: all authors (added and removed) must sign below

**DECLARATION:** All the below listed authors agree that they can claim authorship to the submitted paper as they meet the criteria of the points listed in SECTION TWO.

| List of existing and proposed new authors to sign. Please sign, indicating your agreement to the proposed change. The individuals listed below will each be credited as authors in the published paper. (Please add additional rows if required.) |                  |                      |
|---------------------------------------------------------------------------------------------------------------------------------------------------------------------------------------------------------------------------------------------------|------------------|----------------------|
| Author name                                                                                                                                                                                                                                       | Author signature | Date                 |
| Wenwu Yang                                                                                                                                                                                                                                        | Wenwu Yang       | September 29th, 2019 |
| Xueping Chang                                                                                                                                                                                                                                     | Xueping Chang    | September 29th, 2019 |
| Ruyi Gou                                                                                                                                                                                                                                          | Ruyi Gou         | September 29th, 2019 |
|                                                                                                                                                                                                                                                   |                  |                      |
|                                                                                                                                                                                                                                                   |                  |                      |

**DECLARATION:** All the below listed authors agree that they cannot claim authorship to the submitted paper as they do not (or no longer) meet the criteria of the points listed in SECTION TWO.

| List of removed authors. Please sign, indicating your agreement to be removed from the list of registered authors. The individuals listed below will not be credited as authors in the published paper. (Please add additional rows if required.) |                  |                      |
|---------------------------------------------------------------------------------------------------------------------------------------------------------------------------------------------------------------------------------------------------|------------------|----------------------|
| Author name                                                                                                                                                                                                                                       | Author signature | Date                 |
| Yinghui Li                                                                                                                                                                                                                                        | Yinghui Li       | September 29th, 2019 |
|                                                                                                                                                                                                                                                   |                  |                      |
|                                                                                                                                                                                                                                                   |                  |                      |
